# Supplementary material for: The reaction of NH-indazoles with 1-fluoro-2,4-dinitrobenzene: the unusual formation of benzotriazole-N-oxides
Source: Royal Society of Chemistry journal article supplement (doi:10.1039/c3nj00186e), 2013-01-01
Supplement: c3nj00186e.pdf [file c3nj00186e.pdf]

New Journal of Chemistry

Electronic supplementary information (ESI)

**The Reaction of *NH*-Indazoles with 1-Fluoro-2,4-dinitrobenzene: The Unusual Formation of Benzotriazole-*N*-oxides**

Ibon Alkorta,<sup>a</sup> Fernando P. Cossío,<sup>b]</sup>José Elguero,<sup>a</sup> Nieves Fresno,<sup>a</sup> Laura Hernández-Folgado,<sup>a</sup> Santiago García-Granda,<sup>c</sup> Laura Menéndez-Taboada,<sup>c</sup> Ruth Pérez-Fernández,<sup>a</sup> Felipe Reviriego<sup>a</sup> and Lucia Vázquez-Viñuela<sup>c</sup>

<sup>a</sup> *Instituto de Química Médica, C.S.I.C., Juan de la Cierva, 3, E-28006 Madrid, Spain,*

<sup>b</sup> *Departamento de Química Orgánica I, Kimika Fakultatea, Universidad del País Vasco – Euskal Herriko Unibertsitatea, Manuel de Lardizabal 3, 20018 San Sebastián-Donostia, Spain,*

<sup>c</sup> *Departamento de Química Física y Analítica, Facultad de Química, Universidad de Oviedo-CINN, E-33006 Oviedo, Spain*

**1. General experimental methods**

Flash column chromatography were run on silica gel 60 (0.040–0.063 nm) from Merck. Melting points were measured in open-end glass capillary tubes and are uncorrected. <sup>1</sup>H and <sup>13</sup>C NMR were recorded on a Bruker 300 MHz spectrometer. The chemical shifts are reported relative to the deuterated solvents. LC-MS chromatograms and spectra were recorded on a HPLC 2695 with a Waters 2996 photodiode array detector and Waters Micromass ZQ module. The column used was a Sunfire C18 with 3.5 μm and 50 cm x 4.6 mm. MS spectra were recorded by positive ESI.

Microwave reactions were carried out using a Biotage Initiator <sup>TM</sup> 2,0. LC-MS analyses were performed using an Alliance 2695 (Waters) with a diode array UV/Vis detector Waters 2996 and interfaced to a Micromass ZQ mass spectrometer. Analyses were performed using reversed phase HPLC silica based columns: column Bridge C18 3.5 μm. (2.1 x 100 mm). Using an injection volume of 3 μL., a flow rate of 0.25 mL/min and gradient elution (5 to 95 % over 5 min) of acetonitrile in water. Acetonitrile contains 0.08 % v/v and water contains 0.1 % v/v formic acid. Analyses were monitored at 254 nm wavelength.

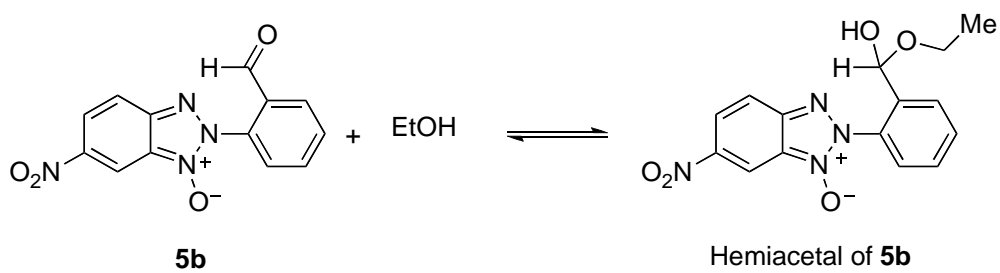

Equilibrium of **11** and its hemiacetal **17**

## 2. $^1\text{H}$ and $^{13}\text{C}$ -NMR spectra

LHNITROP6-2

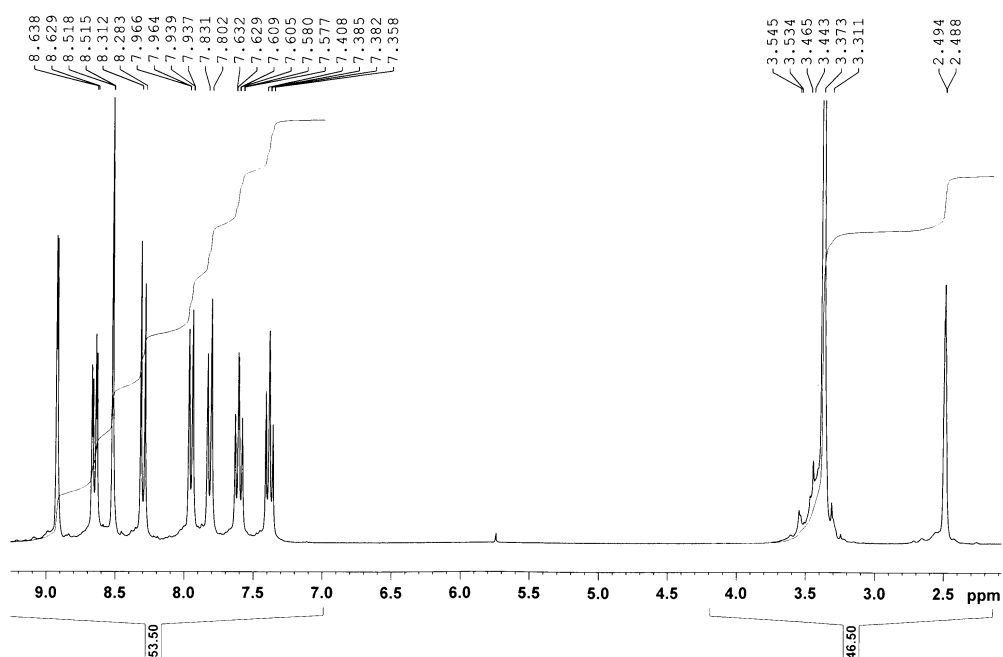

### <sup>1</sup>H-NMR Spectrum of **3b**

LHNITROF6-2

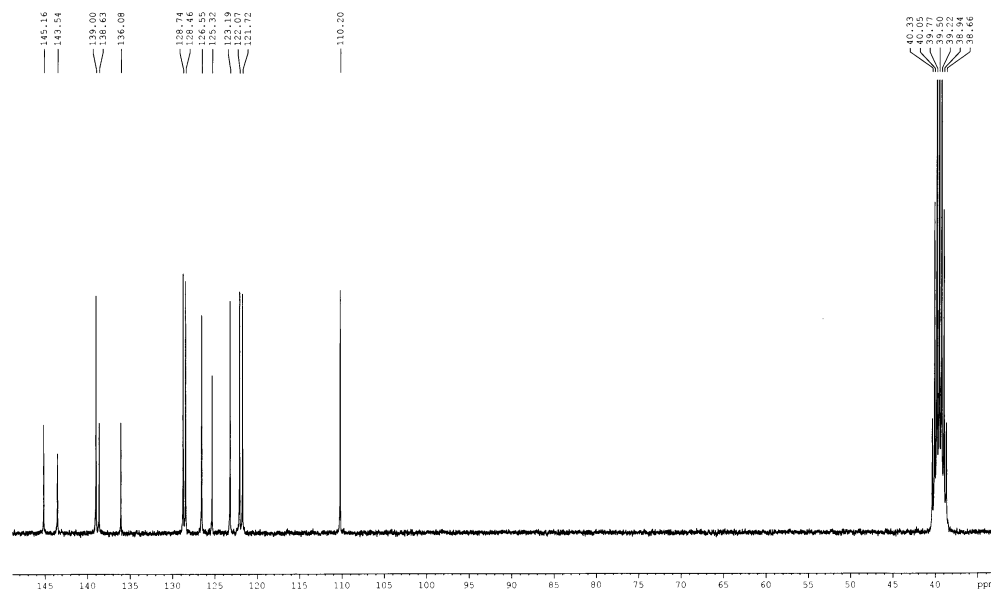

### <sup>13</sup>C-NMR Spectrum of **3b**

LHNitroF26-2

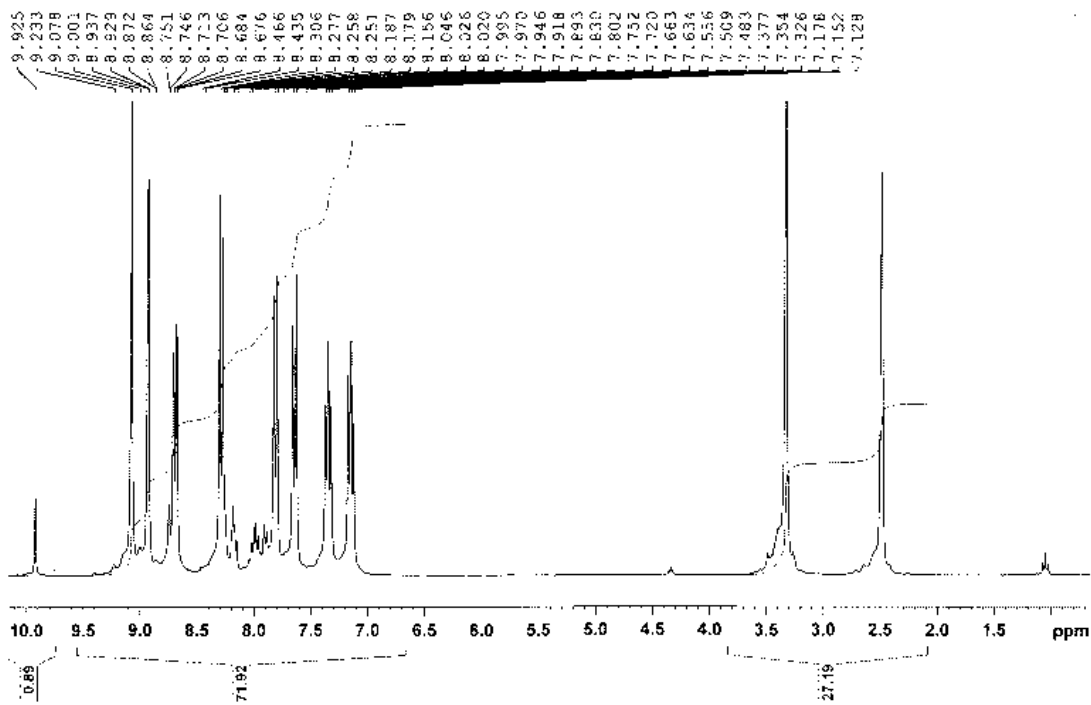

### <sup>1</sup>H-NMR Spectrum of **4b**

LHNITROF26-2-13C  
13C OBSERVE

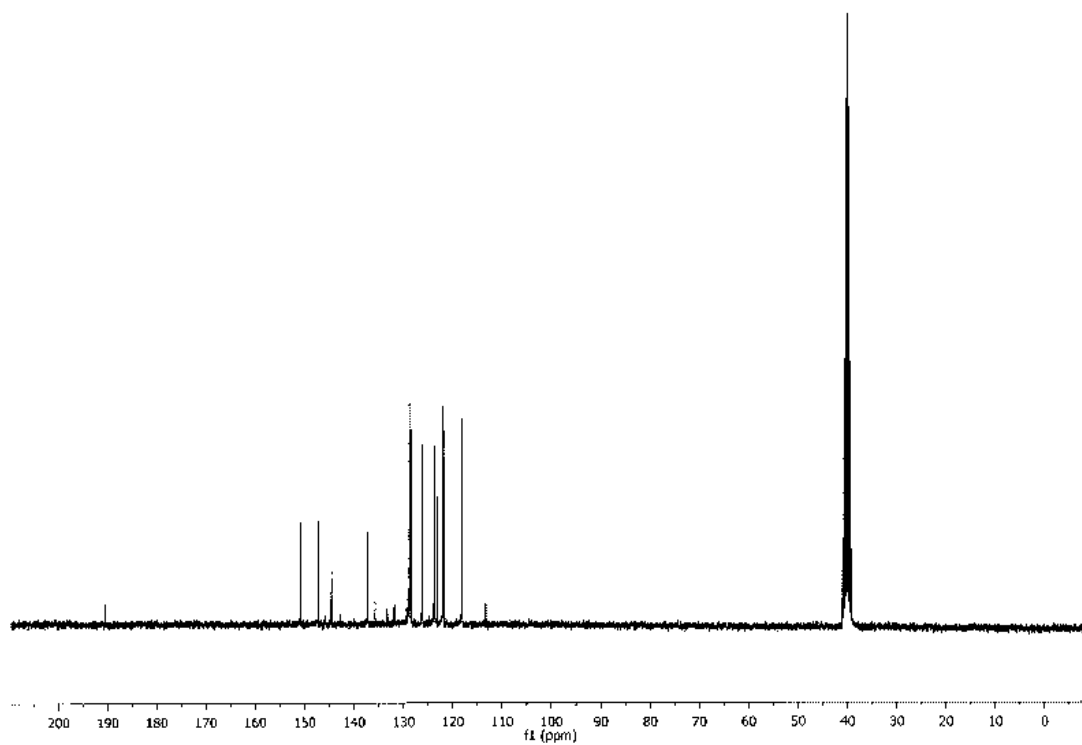

### <sup>13</sup>C-NMR Spectrum of **4b**

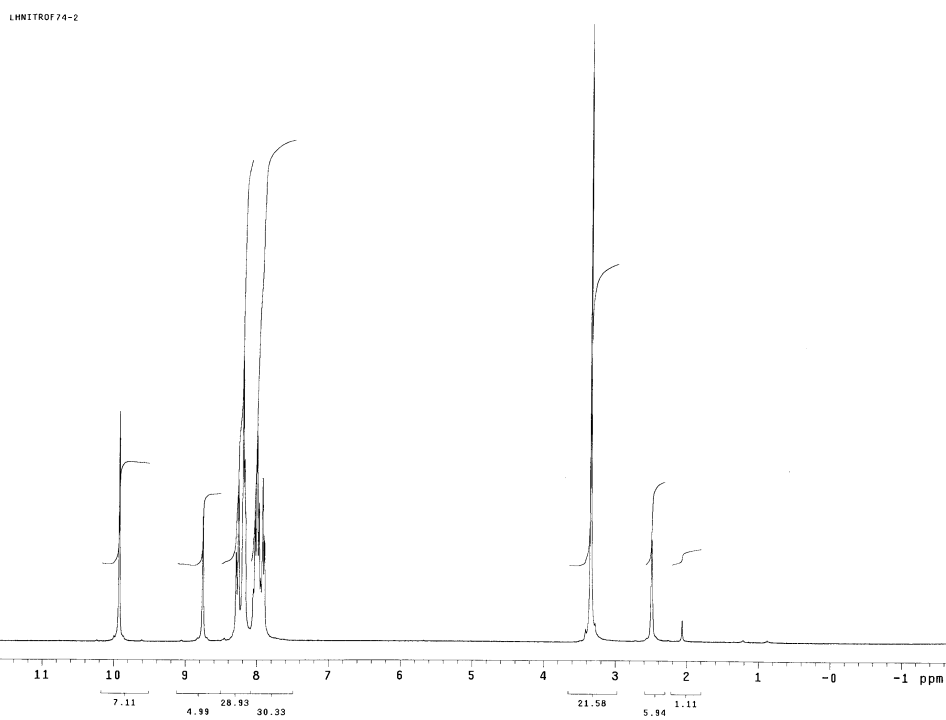

## <sup>1</sup>H-NMR Spectrum of **5b**

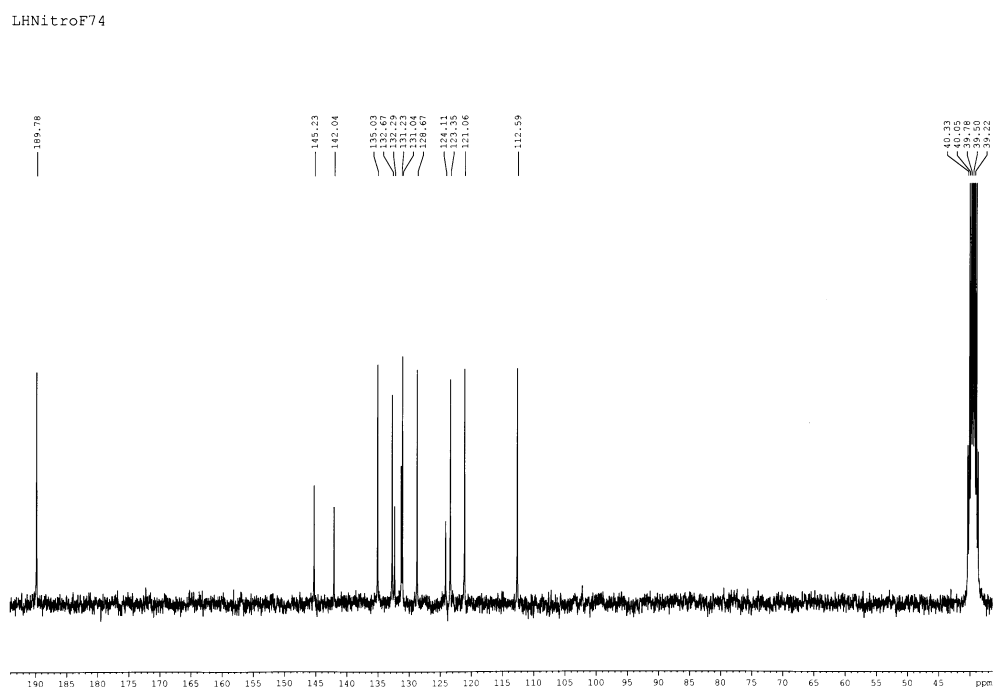

## <sup>13</sup>C-NMR Spectrum of **5b**

### 3. Electronic spectra

#### **Compound 3 (246 nm, Abs= 0.69) [50 % EtOH, 50% PBS]**

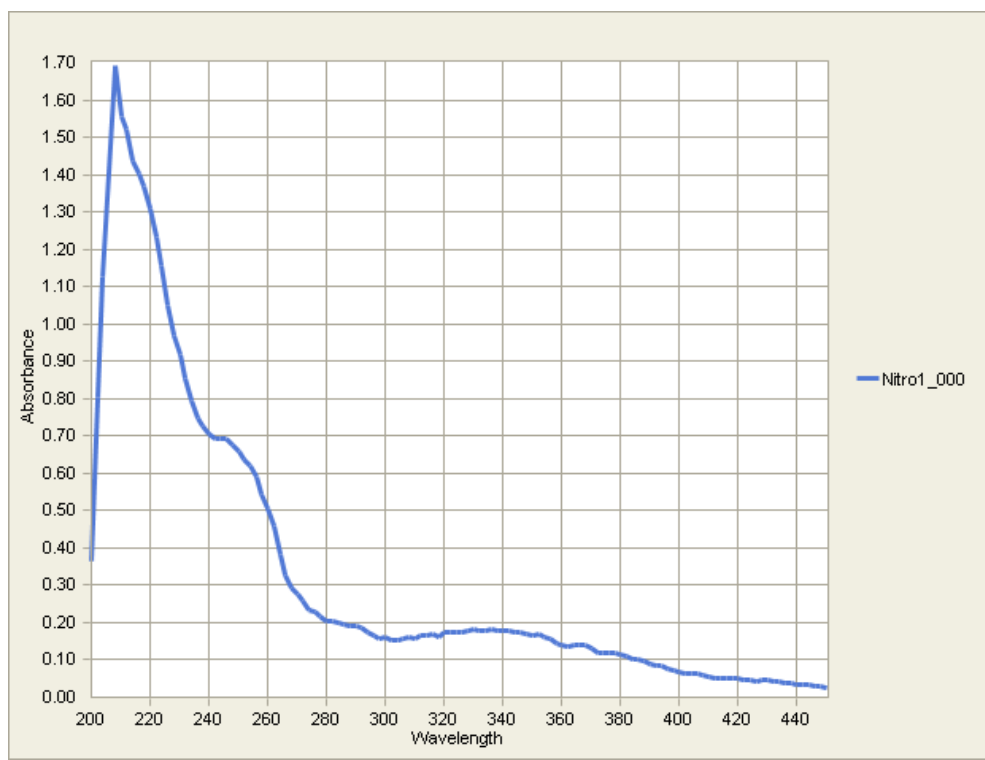

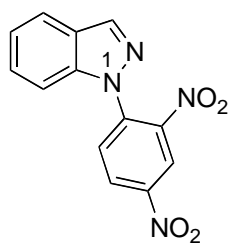

**Compound 4 (274 nm, Abs= 1.20) [20 % EtOH, 80% PBS]**

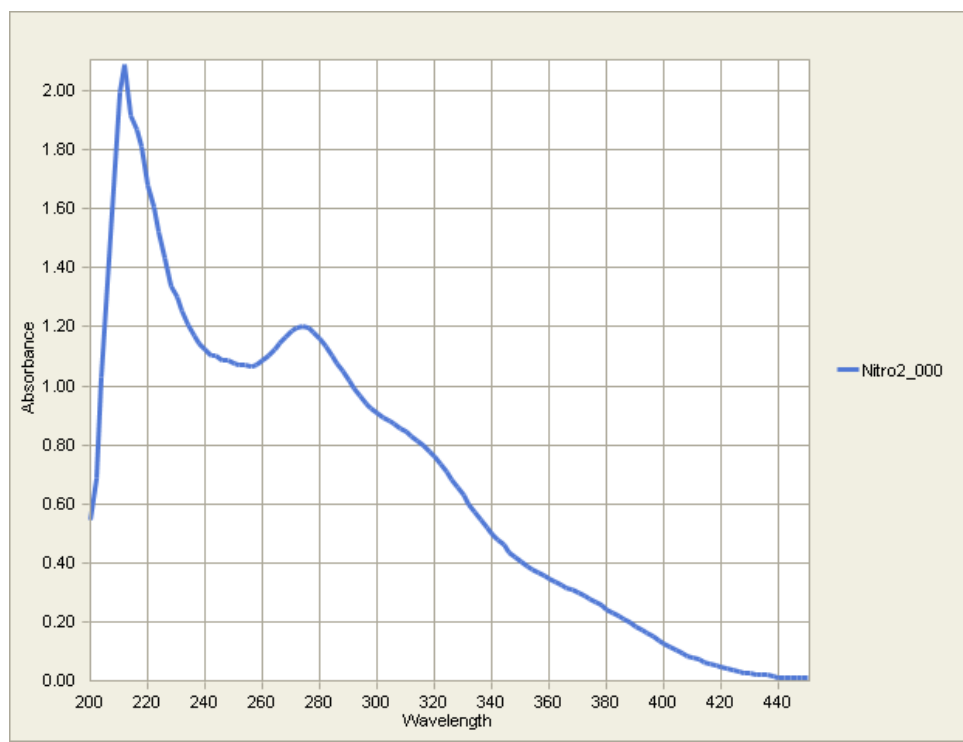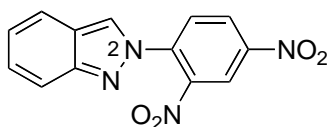

**Compound 5 ( 272 nm, Abs = 1.20; 274 nm, Abs =1.19) [20 % EtOH, 80% PBS]**

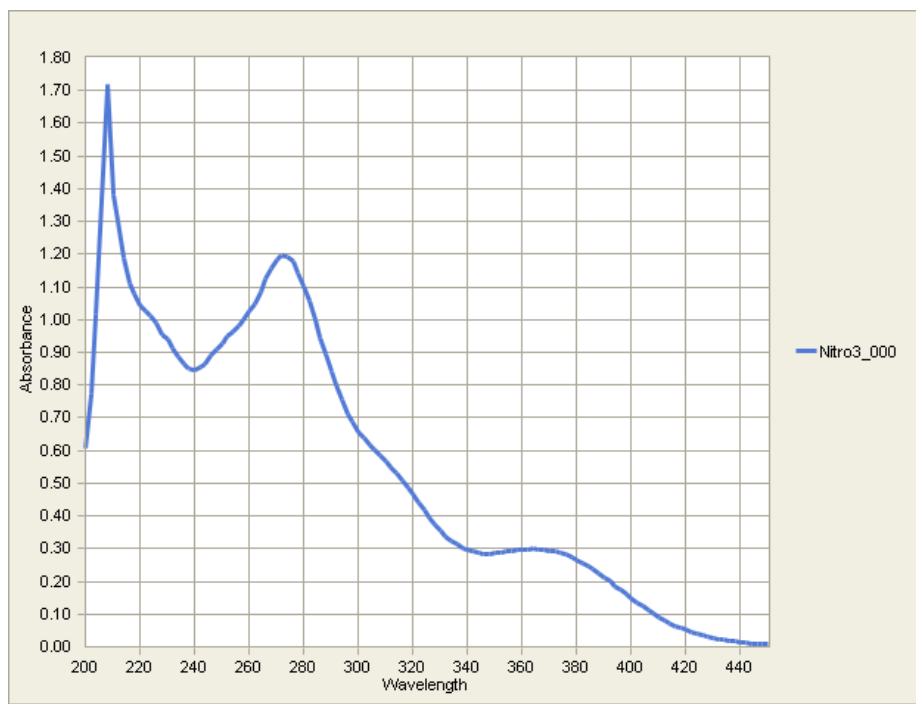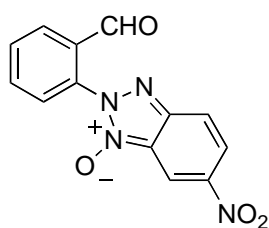

#### 4. Computational data

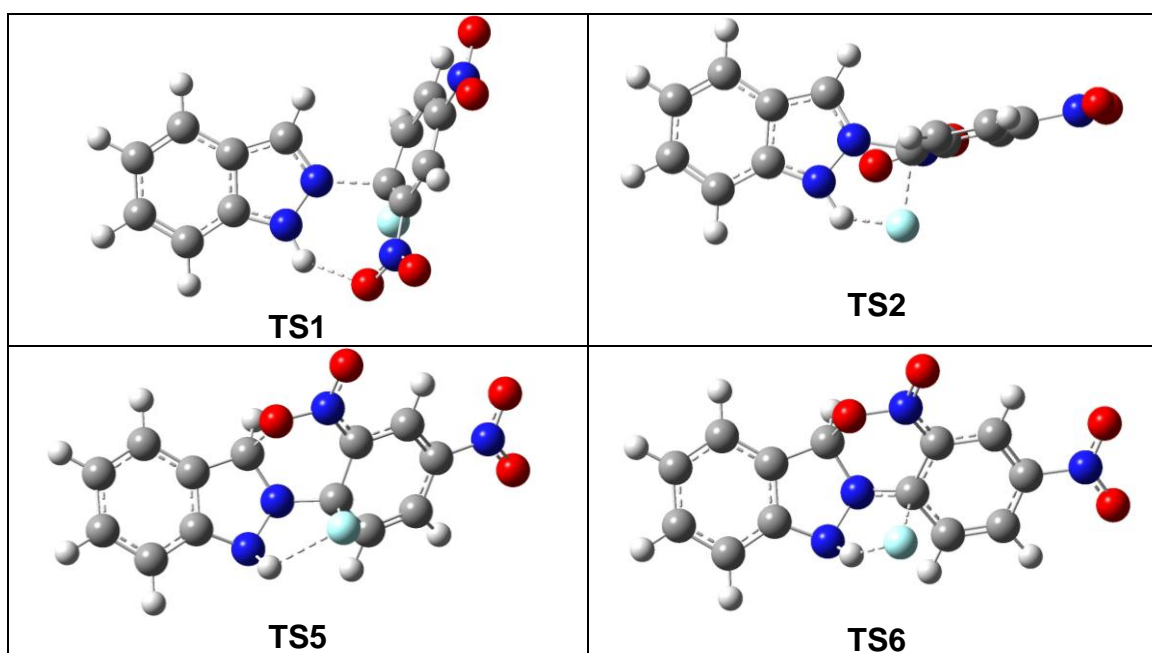

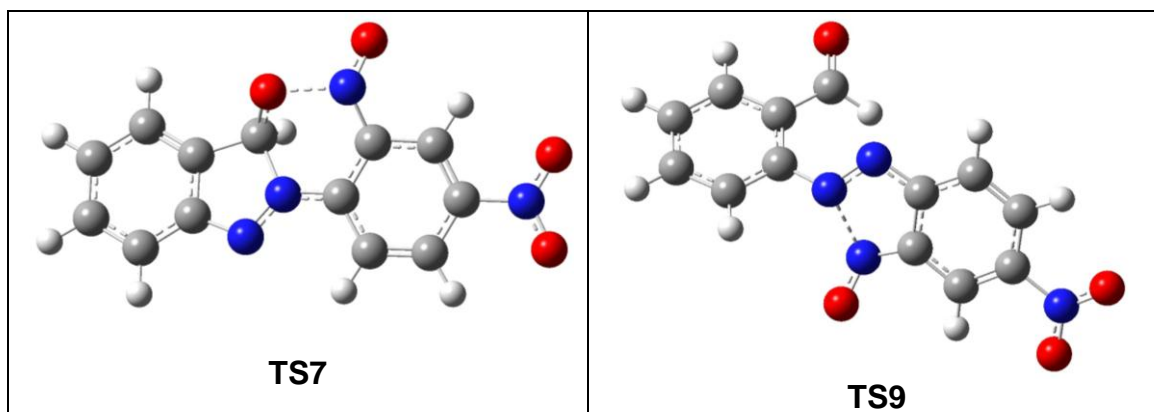

Figure S1. Fully optimized transition structures [B3LYP(PCM)/6-31G(d) level of theory] associated with the reaction profile represented in Figure 15.



Photochemical mechanism.

## Supporting Information

9

B3LYP/6-31G\*

| Center<br>Number | Atomic<br>Number | Atomic<br>Type | Coordinates (Angstroms) |           |           |
|------------------|------------------|----------------|-------------------------|-----------|-----------|
|                  |                  |                | X                       | Y         | Z         |
| 1                | 6                | 0              | 1.154819                | 0.978152  | -0.000392 |
| 2                | 6                | 0              | 2.508099                | 1.172480  | -0.000433 |
| 3                | 6                | 0              | 3.073337                | -0.135267 | -0.000047 |
| 4                | 7                | 0              | 2.153896                | -1.077423 | 0.000224  |
| 5                | 7                | 0              | 0.951081                | -0.390339 | 0.000036  |
| 6                | 6                | 0              | -0.165484               | -1.196109 | 0.000236  |
| 7                | 6                | 0              | -1.503856               | -1.011810 | 0.000093  |
| 8                | 7                | 0              | -2.274833               | 0.197655  | 0.000065  |
| 9                | 8                | 0              | -3.499299               | 0.050269  | -0.000982 |
| 10               | 8                | 0              | -1.710659               | 1.299958  | 0.001234  |
| 11               | 1                | 0              | 0.318969                | 1.654220  | -0.000601 |
| 12               | 1                | 0              | 3.026698                | 2.120115  | -0.000733 |
| 13               | 1                | 0              | 4.119320                | -0.414282 | 0.000041  |
| 14               | 1                | 0              | 0.147323                | -2.234891 | 0.000332  |
| 15               | 1                | 0              | -2.145134               | -1.880894 | -0.000072 |

E(B3LYP)= -508.091357 a.u.

NIMAG=0

ZPVE= 0.107873 a.u.

E(TDB3LYP,S1)= -507.957788 a.u.

CASSCF(4,4)

| Center<br>Number | Atomic<br>Number | Atomic<br>Type | Coordinates (Angstroms) |           |           |
|------------------|------------------|----------------|-------------------------|-----------|-----------|
|                  |                  |                | X                       | Y         | Z         |
| 1                | 6                | 0              | 1.168984                | 0.974812  | 0.000039  |
| 2                | 6                | 0              | 2.499215                | 1.166066  | 0.000125  |
| 3                | 6                | 0              | 3.057085                | -0.151977 | 0.000097  |
| 4                | 7                | 0              | 2.130047                | -1.062219 | 0.000013  |
| 5                | 7                | 0              | 0.946796                | -0.380659 | -0.000020 |
| 6                | 6                | 0              | -0.173862               | -1.183599 | -0.000156 |
| 7                | 6                | 0              | -1.505981               | -1.009221 | -0.000205 |
| 8                | 7                | 0              | -2.272618               | 0.205496  | -0.000006 |
| 9                | 8                | 0              | -3.455900               | 0.065330  | 0.000458  |
| 10               | 8                | 0              | -1.713120               | 1.264002  | -0.000405 |
| 11               | 1                | 0              | 0.361832                | 1.665895  | 0.000013  |
| 12               | 1                | 0              | 3.019801                | 2.099896  | 0.000193  |
| 13               | 1                | 0              | 4.088500                | -0.439148 | 0.000128  |
| 14               | 1                | 0              | 0.125233                | -2.212262 | -0.000108 |
| 15               | 1                | 0              | -2.145428               | -1.863842 | 0.000035  |

E(CASSCF,S0)= -505.187342 a. u.

E(CASSCF-MP2,S0)= -506.621541 a. u.

E(CASSCF,S1)= -504.936567 a. u.

ECASSCF-MP2,S1)= -506.430792 a. u.

10

B3LYP/6-31G\*

| Center<br>Number | Atomic<br>Number | Atomic<br>Type | Coordinates (Angstroms) |   |   |
|------------------|------------------|----------------|-------------------------|---|---|
|                  |                  |                | X                       | Y | Z |

|    |   |   |           |           |           |
|----|---|---|-----------|-----------|-----------|
| 1  | 6 | 0 | -0.434195 | -0.649688 | 0.422418  |
| 2  | 6 | 0 | -1.723904 | -1.325675 | 0.117130  |
| 3  | 6 | 0 | -2.607620 | -0.326541 | -0.143930 |
| 4  | 7 | 0 | -2.078516 | 0.953654  | -0.192651 |
| 5  | 7 | 0 | -0.787312 | 0.769560  | 0.075872  |
| 6  | 6 | 0 | 0.220300  | 1.624546  | 0.015658  |
| 7  | 6 | 0 | 1.537475  | 1.111078  | 0.113083  |
| 8  | 7 | 0 | 1.822280  | -0.182672 | -0.029921 |
| 9  | 8 | 0 | 0.669130  | -1.053108 | -0.352937 |
| 10 | 8 | 0 | 2.912791  | -0.740574 | -0.098105 |
| 11 | 1 | 0 | -0.142290 | -0.649550 | 1.488459  |
| 12 | 1 | 0 | -1.907723 | -2.382454 | 0.232140  |
| 13 | 1 | 0 | -3.669131 | -0.425454 | -0.336140 |
| 14 | 1 | 0 | 0.013993  | 2.674657  | -0.141696 |
| 15 | 1 | 0 | 2.402293  | 1.746133  | 0.246311  |

E(B3LYP)= -508.032642 a. u.

NIMAG=0

ZPVE= 0.106989

E(TDB3LYP,S1)=-507.971319 a. u.

#### CASSCF(4,4)

| Center<br>Number | Atomic<br>Number | Atomic<br>Type | Coordinates (Angstroms) |           |           |
|------------------|------------------|----------------|-------------------------|-----------|-----------|
|                  |                  |                | X                       | Y         | Z         |
| 1                | 6                | 0              | -0.419265               | -0.619917 | 0.416405  |
| 2                | 6                | 0              | -1.701610               | -1.314101 | 0.106801  |
| 3                | 6                | 0              | -2.579420               | -0.350618 | -0.145090 |
| 4                | 7                | 0              | -2.046874               | 0.941769  | -0.168290 |
| 5                | 7                | 0              | -0.778965               | 0.762397  | 0.085021  |
| 6                | 6                | 0              | 0.225200                | 1.631976  | 0.021008  |
| 7                | 6                | 0              | 1.537837                | 1.103421  | 0.080168  |
| 8                | 7                | 0              | 1.769514                | -0.198981 | -0.055804 |
| 9                | 8                | 0              | 0.681173                | -0.996381 | -0.347952 |
| 10               | 8                | 0              | 2.845934                | -0.770414 | -0.063014 |
| 11               | 1                | 0              | -0.142406               | -0.659636 | 1.466352  |
| 12               | 1                | 0              | -1.859437               | -2.368178 | 0.185440  |
| 13               | 1                | 0              | -3.626431               | -0.452928 | -0.346488 |
| 14               | 1                | 0              | 0.017356                | 2.669889  | -0.126274 |
| 15               | 1                | 0              | 2.411880                | 1.704349  | 0.206463  |

E(CASSCF,S0)= -505.114617 a. u.

E(CASSCF-MP2,S0)= -506.562533 a. u.

E(CASSCF,S1)= -504.989975 a. u.

ECASSCF-MP2,S1)= -506.429923 a. u.

**12**

B3LYP/6-31G\*

| Center<br>Number | Atomic<br>Number | Atomic<br>Type | Coordinates (Angstroms) |           |           |
|------------------|------------------|----------------|-------------------------|-----------|-----------|
|                  |                  |                | X                       | Y         | Z         |
| 1                | 6                | 0              | -0.590763               | -0.630593 | 0.596753  |
| 2                | 6                | 0              | -1.802318               | -1.274019 | 0.214969  |
| 3                | 6                | 0              | -2.591787               | -0.269172 | -0.340575 |
| 4                | 7                | 0              | -2.040550               | 0.958776  | -0.401840 |
| 5                | 7                | 0              | -0.799400               | 0.738658  | 0.154136  |
| 6                | 6                | 0              | 0.228988                | 1.566384  | 0.133095  |
| 7                | 6                | 0              | 1.528464                | 1.063985  | 0.265947  |
| 8                | 7                | 0              | 1.806863                | -0.232153 | -0.066989 |
| 9                | 8                | 0              | 0.809530                | -1.127031 | -0.225039 |
| 10               | 8                | 0              | 2.940143                | -0.613935 | -0.349157 |
| 11               | 1                | 0              | -0.147699               | -0.704313 | 1.593345  |
| 12               | 1                | 0              | -2.084364               | -2.288063 | 0.449227  |

|    |   |   |           |           |           |
|----|---|---|-----------|-----------|-----------|
| 13 | 1 | 0 | -3.605947 | -0.379558 | -0.708416 |
| 14 | 1 | 0 | 0.033211  | 2.610798  | -0.084162 |
| 15 | 1 | 0 | 2.403510  | 1.692397  | 0.325292  |

---

E(B3LYP)= -508.018027 a. u.

NIMAG=1 (-737.9960 cm<sup>-1</sup>)

ZPVE= 0.105616 a. u.

E(TDB3LYP,S1)= -507.971319 a. u.

#### CASSCF(4,4)

---

| Center<br>Number | Atomic<br>Number | Atomic<br>Type | Coordinates (Angstroms) |           |           |
|------------------|------------------|----------------|-------------------------|-----------|-----------|
|                  |                  |                | X                       | Y         | Z         |
| 1                | 6                | 0              | -0.502606               | -0.633285 | 0.585671  |
| 2                | 6                | 0              | -1.731960               | -1.275982 | 0.219341  |
| 3                | 6                | 0              | -2.523460               | -0.270030 | -0.340013 |
| 4                | 7                | 0              | -1.990587               | 0.915542  | -0.300384 |
| 5                | 7                | 0              | -0.781251               | 0.728933  | 0.352715  |
| 6                | 6                | 0              | 0.247118                | 1.580017  | 0.119250  |
| 7                | 6                | 0              | 1.516108                | 1.116799  | -0.009228 |
| 8                | 7                | 0              | 1.737641                | -0.225197 | -0.166497 |
| 9                | 8                | 0              | 0.700221                | -0.988363 | -0.434476 |
| 10               | 8                | 0              | 2.833492                | -0.741686 | -0.045152 |
| 11               | 1                | 0              | -0.007759               | -0.854157 | 1.517198  |
| 12               | 1                | 0              | -1.962110               | -2.311959 | 0.340634  |
| 13               | 1                | 0              | -3.500984               | -0.386349 | -0.764876 |
| 14               | 1                | 0              | 0.016673                | 2.625526  | 0.079985  |
| 15               | 1                | 0              | 2.392658                | 1.727278  | 0.013120  |

---

E(CASSCF,S0-S1)= -505.0761925 a. u.

E(CASSCF-MP2, S0-S1)= -506.529006 a. u.
